# Supplementary material for: Electrocardiographic and cardiometabolic risk markers of left ventricular diastolic dysfunction in physically active adults: CHIEF heart study
Source: PubMed Central journal article supplement (PMC9363619; doi:10.3389/fcvm.2022.941912), 2022-07-27
Supplement: Table_1.pdf [file Table_1.pdf]

**Supplemental Table.** Correlations between Cardiometabolic Risk Factors and LV Diastolic Parameters in Men

|                | E/A                                                       |        |                                               |        | e'                                                        |        |                                               |        | E/e'                                                      |       |                                               |        |
|----------------|-----------------------------------------------------------|--------|-----------------------------------------------|--------|-----------------------------------------------------------|--------|-----------------------------------------------|--------|-----------------------------------------------------------|-------|-----------------------------------------------|--------|
|                | Multiple Linear Regression<br>for cardiometabolic markers |        | Multiple Linear Regression<br>for ECG markers |        | Multiple Linear Regression<br>for cardiometabolic markers |        | Multiple Linear Regression<br>for ECG markers |        | Multiple Linear Regression<br>for cardiometabolic markers |       | Multiple Linear Regression<br>for ECG markers |        |
|                | $\beta$ (95% CI)                                          | p      | $\beta$ (95% CI)                              | p      | $\beta$ (95% CI)                                          | p      | $\beta$ (95% CI)                              | p      | $\beta$ (95% CI)                                          | p     | $\beta$ (95% CI)                              | p      |
| Age            | -0.033<br>(-0.039, -0.027)                                | <0.01  | -0.038<br>(-0.044, -0.032)                    | <0.001 | -0.661<br>(-0.860, -0.463)                                | <0.001 | -0.821<br>(-1.009, -0.632)                    | <0.001 | 0.022<br>(0.008, 0.037)                                   | 0.003 | 0.038<br>(0.024, 0.052)                       | <0.001 |
| Time for a run | 1.886*10 <sup>-5</sup><br>(0.000, 0.000)                  | 0.91   | -5.047*10 <sup>-5</sup><br>(0.000, 0.000)     | 0.77   | 0.006<br>(-0.006, 0.017)                                  | 0.32   | 0.005<br>(-0.006, 0.017)                      | 0.36   | 0.001<br>(0.000, 0.002)                                   | 0.12  | 0.001<br>(0.000, 0.002)                       | 0.02   |
| Pulse rate     | -0.016<br>(-0.019, -0.013)                                | <0.001 | -0.019<br>(-0.022, -0.015)                    | <0.001 | -0.149<br>(-0.245, -0.053)                                | 0.002  | -0.203<br>(-0.314, -0.093)                    | <0.001 | 0.001<br>(-0.006, 0.008)                                  | 0.76  | 0.008<br>(-0.001, 0.016)                      | 0.07   |
